# Supplementary material
Source: HighWire-hosted journal article supplement (https://www.ajevonline.org/content/suppl/2019/03/22/ajev.2018.18032)
Supplement: Supplemental_Data.pdf [file Supplemental_Data.pdf]

**Supplemental Data for:**

Sambucci O, Alston JM, Fuller KB and Lusk J. 2019.

The pecuniary and nonpecuniary costs of powdery mildew and the potential value of resistant grape varieties in California. *Am J Enol Vitic* 70:177-187. doi: 10.5344/ajev.2018.18032.

| <b>Supplemental Table 1</b> Chemicals used for powdery mildew control. <sup>a</sup> |                                                |                                                                                                                     |                         |
|-------------------------------------------------------------------------------------|------------------------------------------------|---------------------------------------------------------------------------------------------------------------------|-------------------------|
| <b>Chemical group (active ingredient)</b>                                           | <b>Total pounds applied (2015)<sup>b</sup></b> | <b>Chemical name</b>                                                                                                | <b>Disease pressure</b> |
| Sulfur compounds                                                                    | 31,217,162                                     | Sulfur<br>Lime-sulfur                                                                                               | All                     |
| Contact materials                                                                   | 2,521,482                                      | Potassium bicarbonate<br>Petroleum distillates<br>Neem oil<br>Cinnamaldehyde                                        | All, eradicant          |
| Sterol inhibitors                                                                   | 124,835                                        | Tebuconazole<br>Triflumizole<br>Myclobutanil<br>Fenarimol<br>Triadimefon<br>Difenoconazole                          | All                     |
| Strobilurins                                                                        | 169,354                                        | Azoxystrobin<br>Trifloxystrobin<br>Kresoxim-methyl<br>Pyraclostrobin<br>Boscalid                                    | All                     |
| Cell-signaling inhibitor                                                            | 40,323                                         | Quinoxifen                                                                                                          | Low-moderate            |
| Biologicals                                                                         | 19,351                                         | <i>Bacillus sumilus</i><br><i>Bacillus subtilis</i><br><i>Reynoutra sacalinensis</i><br><i>Streptomyces ludicus</i> | All                     |
| Multichemical formulations <sup>c</sup>                                             | 84,209                                         | Fluopyram+Tebuconazole<br>Difenoconazole+Cyprodinil                                                                 | All                     |
| Benzophenone                                                                        | 44,157                                         | Metrafenone                                                                                                         | All                     |
| Systemic acquired resistance products                                               | 13                                             | Harpin protein<br>L-glutamic acid                                                                                   | Low                     |
| Other                                                                               | 35,351                                         | Mancozeb<br>Captan, other related<br>Benomyl                                                                        | Low-moderate            |

<sup>a</sup>Sources: Pesticide Use Reports database ([www.cdpr.ca.gov/docs/pur/purmain.htm](http://www.cdpr.ca.gov/docs/pur/purmain.htm)) list of products used for control of powdery mildew is from UC IPM (2015).<sup>b</sup>Weight of active ingredient only.<sup>c</sup>Excludes chemicals accounted for in previous categories, such as Tebuconazole and Difenoconazole.

**Supplemental Data for:**

Sambucci O, Alston JM, Fuller KB and Lusk J. 2019.

The pecuniary and nonpecuniary costs of powdery mildew and the potential value of resistant grape varieties in California.

Am J Enol Vitic 70:177-187. doi: 10.5344/ajev.2018.18032.

**Supplemental Table 2** Labor and equipment rates and time/acre for a single application, summary of recent UCCE studies.<sup>a</sup>

| Hourly rates for equipment and labor             | Labor (\$/hr)            |                           | Equipment (\$/hr)          |                    |                                |                               |
|--------------------------------------------------|--------------------------|---------------------------|----------------------------|--------------------|--------------------------------|-------------------------------|
|                                                  | Equipment operators      | Field workers             | Duster attachment          | Sprayer attachment | Tractor for spray applications | Tractor for dust applications |
| <b>North Coast Region</b>                        |                          |                           |                            |                    |                                |                               |
| Napa–2012                                        | 20.3                     | 17.7                      | n/a                        | 5.8                | 15.2                           | 15.2                          |
| Sonoma–2010                                      | 20.1                     | 16.1                      | 10.2                       | 14.3               | 17.6                           | 17.6                          |
| Lake–2008                                        | 13.3                     | 10.6                      | n/a                        | 13.7               | 16.9                           | 16.9                          |
| <b>San Joaquin and Sacramento Valley Regions</b> |                          |                           |                            |                    |                                |                               |
| San Joaquin Valley North–2012                    | 16.1                     | 13.4                      | 3.0                        | 3.9                | 21.8                           | 8.9                           |
| San Joaquin Valley South–2008                    | 14.6                     | 11.0                      | 2.8                        | 8.5                | 10.8                           | 10.8                          |
| Sacramento Valley–2013                           | 15.4                     | 12.1                      | 4.6                        | 16.3               | 22.3                           | 19.9                          |
| Time/acre for single application                 | Dusting sulfur (hr/acre) | Wettable sulfur (hr/acre) | Other fungicides (hr/acre) |                    |                                |                               |
| Napa–2012                                        | n/a                      | 1.00                      | 1.00                       |                    |                                |                               |
| Sonoma–2010                                      | 0.22                     | 0.38                      | 1.15                       |                    |                                |                               |
| Lake–2008                                        | n/a                      | 0.69                      | 0.69                       |                    |                                |                               |
| San Joaquin Valley North–2012                    | 0.29                     | 0.36                      | 0.36                       |                    |                                |                               |
| San Joaquin Valley South–2008                    | 0.30                     | 0.50                      | 0.50                       |                    |                                |                               |
| Sacramento Valley–2013                           | 0.36                     | 0.39                      | 0.39                       |                    |                                |                               |

<sup>a</sup>Sources: Created from the following University of California Cooperative Extension (UCCE) Cost and Return Studies: Sacramento Valley, Chardonnay (UCCE 2013); Napa Valley, Cabernet Sauvignon (UCCE 2012b); Sonoma County, Cabernet Sauvignon (UCCE 2010); San Joaquin Valley, Cabernet Sauvignon (UCCE 2012a); San Joaquin Valley, Organic Raisin Grapes (UCCE 2008); San Joaquin Valley, Thompson Seedless Table Grapes (UCCE 2007); Sonoma, Chardonnay (UCCE 2004); Lake County, Red Varieties (UCCE 2008b); Lake County, White Varieties (UCCE 2008c).

**Supplemental Data for:**

Sambucci O, Alston JM, Fuller KB and Lusk J. 2019.

The pecuniary and nonpecuniary costs of powdery mildew and the potential value of resistant grape varieties in California. Am J Enol Vitic 70:177-187. doi: 10.5344/ajev.2018.18032.

---

---

| <b>Supplemental Table 3</b> Costs (\$/acre) for a single application. <sup>a</sup> |                       |                        |                         |
|------------------------------------------------------------------------------------|-----------------------|------------------------|-------------------------|
|                                                                                    | <b>Dusting sulfur</b> | <b>Wettable sulfur</b> | <b>Other fungicides</b> |
| <b>Napa County–2012</b>                                                            |                       |                        |                         |
| Labor                                                                              | n/a                   | 24.36                  | 24.36                   |
| Equipment                                                                          |                       | 22.48                  | 22.48                   |
| <b>Total</b>                                                                       |                       | <b>46.84</b>           | <b>46.84</b>            |
| <b>Sonoma County–2010</b>                                                          |                       |                        |                         |
| Labor                                                                              | 5.31                  | 9.17                   | 27.74                   |
| Equipment                                                                          | 6.50                  | 12.79                  | 38.71                   |
| <b>Total</b>                                                                       | <b>11.81</b>          | <b>21.96</b>           | <b>66.45</b>            |
| <b>Lake County–2008</b>                                                            |                       |                        |                         |
| Labor                                                                              | n/a                   | 11.01                  | 11.01                   |
| Equipment                                                                          |                       | 19.16                  | 19.16                   |
| <b>Total</b>                                                                       |                       | <b>30.17</b>           | <b>30.17</b>            |
| <b>San Joaquin Valley North–2012</b>                                               |                       |                        |                         |
| Labor                                                                              | 5.60                  | 6.95                   | 6.95                    |
| Equipment                                                                          | 3.71                  | 10.05                  | 10.05                   |
| <b>Total</b>                                                                       | <b>9.30</b>           | <b>16.99</b>           | <b>16.99</b>            |
| <b>San Joaquin Valley South–2008</b>                                               |                       |                        |                         |
| Labor                                                                              | 5.27                  | 8.78                   | 8.78                    |
| Equipment                                                                          | 4.42                  | 10.20                  | 10.20                   |
| <b>Total</b>                                                                       | <b>9.68</b>           | <b>18.98</b>           | <b>18.98</b>            |
| <b>Sacramento Valley–2013</b>                                                      |                       |                        |                         |
| Labor                                                                              | 6.65                  | 7.21                   | 7.21                    |
| Equipment                                                                          | 9.52                  | 15.93                  | 15.93                   |
| <b>Total</b>                                                                       | <b>16.17</b>          | <b>23.14</b>           | <b>23.14</b>            |

<sup>a</sup>Notes: In addition to the hours/acre for a single application listed in Supplemental Table 2, a time allowance of 20% is added to calculations of costs/acre for equipment operator labor, and a time allowance of 10% is added to the tractor time to allow for preparation and removal of materials and equipment.

**Supplemental Data for:**

Sambucci O, Alston JM, Fuller KB and Lusk J. 2019.

The pecuniary and nonpecuniary costs of powdery mildew and the potential value of resistant grape varieties in California. *Am J Enol Vitic* 70:177-187. doi: 10.5344/ajev.2018.18032.

**Supplemental Table 4** Costs (\$/acre) to treat powdery mildew: sample budgets, 2013.<sup>a</sup>

| Chemical                  | Central Coast Chardonnay |           |          | San Joaquin Valley North table grapes |           |          | San Joaquin Valley South raisins |           |          |
|---------------------------|--------------------------|-----------|----------|---------------------------------------|-----------|----------|----------------------------------|-----------|----------|
|                           | Labor                    | Machinery | Material | Labor                                 | Machinery | Material | Labor                            | Machinery | Material |
| Dusting sulfur            | n/a                      | n/a       | n/a      | 6                                     | 5         | 2        | 7                                | 5         | 2        |
| Wettable sulfur           | n/a                      | n/a       | n/a      | 6                                     | 5         | 2        | 7                                | 5         | 3        |
| Sterol inhibitors         | 15                       | 11        | 35       | 18                                    | 14        | 63       | 13                               | 10        | 31       |
| Strobilurins              | 15                       | 11        | 45       | 6                                     | 5         | 67       | n/a                              | n/a       | n/a      |
| Cell-signaling inhibitors | 8                        | 10        | 31       | n/a                                   | n/a       | n/a      | n/a                              | n/a       | n/a      |
| Contact                   | 7                        | 5         | 31       | n/a                                   | n/a       | n/a      | n/a                              | n/a       | n/a      |

<sup>a</sup>Source: Developed from Tables A1 to A12 in Fuller et al. (2014).

**Supplemental Table 5** Environmental impact quotient (EIQ) values for chemicals used for powdery mildew control.<sup>a</sup>

| Chemical category                     | Chemical name          | EIQ/lb chemical |             |          |         |
|---------------------------------------|------------------------|-----------------|-------------|----------|---------|
|                                       |                        | Total           | Farm worker | Consumer | Ecology |
| Benzophenone                          | Metrafenone            | n/a             | n/a         | n/a      | n/a     |
| Biologicals                           | Bacillus pumilus       | n/a             | n/a         | n/a      | n/a     |
|                                       | Bacillus subtilis      | n/a             | n/a         | n/a      | n/a     |
|                                       | Ampelomyces quisqualis | n/a             | n/a         | n/a      | n/a     |
| Cell signaling inhibitor              | Quinoxifen             | 32.00           | 10.00       | 6.00     | 80.00   |
| Contact materials                     | Potassium bicarbonate  | 8.00            | 6.00        | 2.00     | 16.00   |
|                                       | Petroleum distillates  | n/a             | n/a         | n/a      | n/a     |
|                                       | Neem oil               | n/a             | n/a         | n/a      | n/a     |
|                                       | Cinnamaldehyde         | n/a             | n/a         | n/a      | n/a     |
| Multichemical formulatios             | Difenoconazole         | 41.50           | 15.00       | 23.50    | 86.00   |
|                                       | Cyprodinil             | 26.77           | 12.15       | 14.73    | 53.45   |
| Sterol inhibitors                     | Tebuconazole           | 40.33           | 20.00       | 31.00    | 70.00   |
|                                       | Triflumizole           | 20.42           | 11.40       | 6.70     | 43.15   |
|                                       | Myclobutanil           | 24.01           | 8.10        | 12.15    | 51.79   |
|                                       | Fenarimol              | 18.10           | 12.00       | 15.00    | 27.30   |
|                                       | Triadimefon            | 26.96           | 12.15       | 15.15    | 53.57   |
| Strobilurins                          | Azoxystrobin           | 26.92           | 8.10        | 6.05     | 66.62   |
|                                       | Trifloxystrobin        | 29.78           | 12.15       | 10.23    | 66.95   |
|                                       | Kresoxim-methyl        | 15.07           | 9.00        | 4.50     | 31.70   |
|                                       | Pyraclostrobin         | 27.01           | 8.10        | 4.05     | 68.87   |
|                                       | Boscalid               | 26.44           | 12.15       | 21.23    | 45.95   |
| Sulfur compounds                      | Sulfur                 | 32.66           | 21.87       | 8.29     | 67.82   |
|                                       | Lime-sulfur            | 67.67           | 108.00      | 19.00    | 76.00   |
| Systemic acquired resistance products | Harpin protein         | n/a             | n/a         | n/a      | n/a     |
|                                       | L-glutamic acid        | n/a             | n/a         | n/a      | n/a     |
| Other                                 | Mancozeb               | 25.72           | 20.25       | 8.13     | 48.79   |
|                                       | Captan, other related  | 15.77           | 12.00       | 5.00     | 30.30   |
|                                       | Benomyl                | 30.24           | 13.80       | 13.60    | 63.32   |

<sup>a</sup>Sources: Active ingredients for each product were obtained from the Environmental Protection Agency website (<https://www.epa.gov/pesticide-labels>). EIQ values by chemical name and active ingredient are from Eshenaur et al. (1992 to 2015).

**Supplemental Data for:**

Sambucci O, Alston JM, Fuller KB and Lusk J. 2019.

The pecuniary and nonpecuniary costs of powdery mildew and the potential value of resistant grape varieties in California. *Am J Enol Vitic* 70:177-187. doi: 10.5344/ajev.2018.18032.

**Supplemental Table 6** Values of the environmental impact quotient (EIQ) for non-powdery mildew chemicals used on grapes.<sup>a</sup>

| Category/product name<br>(active ingredient)         | EIQ/lb chemical |             |          |             |
|------------------------------------------------------|-----------------|-------------|----------|-------------|
|                                                      | Total           | Farm worker | Consumer | Environment |
| <b>Fungicides</b>                                    |                 |             |          |             |
| Champ (copper hydroxide)                             | 33.20           | 24.30       | 9.05     | 66.25       |
| Vanguard (cyprodinil)                                | 26.77           | 12.15       | 14.73    | 53.45       |
| Applaud (buprofezin)                                 | 34.97           | 12.00       | 19.00    | 73.90       |
| <b>Insecticides</b>                                  |                 |             |          |             |
| AgriMek (abamectin)                                  | 34.68           | 13.80       | 3.90     | 86.35       |
| Altacor (chlorantraniliprole)                        | 18.34           | 6.90        | 6.45     | 41.66       |
| Intrepid (methoxyfenozide)                           | 32.08           | 10.00       | 8.00     | 78.25       |
| Kryocide (cryolite)                                  | 20.16           | 13.11       | 4.99     | 42.37       |
| Lorsban (clorpyrifos)                                | 26.85           | 6.00        | 2.00     | 72.55       |
| Movento (spirotetramat)                              | 35.29           | 13.11       | 5.99     | 86.77       |
| Provado (imidacloprid)                               | 36.71           | 6.90        | 10.35    | 92.88       |
| <b>Herbicides</b>                                    |                 |             |          |             |
| Rely (glufosinate-ammonium)                          | 20.20           | 12.00       | 6.00     | 42.60       |
| Roundup, Glyphos (isopropylamine salt of glyphosate) | 15.33           | 8.00        | 3.00     | 35.00       |
| Surflan (oryzalin)                                   | 18.10           | 9.00        | 6.00     | 39.30       |
| <b>Other</b>                                         |                 |             |          |             |
| Acramite (bifenazate)                                | 28.10           | 6.90        | 2.45     | 74.95       |
| Ethrel (ethephon)                                    | 24.80           | 21.30       | 5.65     | 47.45       |
| Neutral zinc (zinc, sulfur)                          | 32.66           | 21.87       | 8.29     | 67.82       |

<sup>a</sup>Sources: Active ingredients for each product were obtained from the Environmental Protection Agency website (<https://www.epa.gov/pesticide-labels>). EIQ values by chemical name and active ingredient are from Eshenaur et al. (1992 to 2015).

**Supplemental Data for:**

Sambucci O, Alston JM, Fuller KB and Lusk J. 2019.

The pecuniary and nonpecuniary costs of powdery mildew and the potential value of resistant grape varieties in California.

Am J Enol Vitic 70:177-187. doi: 10.5344/ajev.2018.18032.

---

---

**Supplemental Table 7** Summary demographic characteristics of survey respondents.

| <b>Characteristic</b>     | <b>Respondents</b> | <b>Percent</b> |
|---------------------------|--------------------|----------------|
| <b>Category of grapes</b> |                    |                |
| Wine                      | 60                 | 0.56           |
| Table                     | 18                 | 0.17           |
| Raisin                    | 11                 | 0.10           |
| Unknown                   | 19                 | 0.18           |
| <b>Region</b>             |                    |                |
| Unknown                   | 9                  | 0.08           |
| North Coast               | 26                 | 0.23           |
| Central Coast             | 3                  | 0.03           |
| Southern Central Valley   | 16                 | 0.14           |
| Nothern Central Valley    | 3                  | 0.03           |
| Other California          | 15                 | 0.13           |
| <b>Acres managed</b>      |                    |                |
| Fewer than 10             | 16                 | 0.21           |
| 10 to 49                  | 12                 | 0.16           |
| 50 to 99                  | 6                  | 0.08           |
| 100 to 199                | 6                  | 0.08           |
| 200 to 299                | 6                  | 0.08           |
| 300 to 399                | 8                  | 0.11           |
| 400 to 799                | 6                  | 0.08           |
| Over 800                  | 16                 | 0.21           |
| <b>Gender</b>             |                    |                |
| Male                      | 49                 | 0.89           |
| Female                    | 6                  | 0.11           |
| <b>Education</b>          |                    |                |
| Bachelor's degree         | 53                 | 0.49           |
| Graduate degree           | 15                 | 0.14           |
| <b>Income Level</b>       |                    |                |
| Less than \$50,000        | 4                  | 0.09           |
| \$50,000 to \$99,000      | 3                  | 0.07           |
| \$100,000 to \$149,000    | 13                 | 0.28           |
| \$150,000 to \$199,000    | 11                 | 0.24           |
| \$200,000 to \$299,000    | 9                  | 0.20           |
| \$300,000 or more         | 7                  | 0.15           |
| Unknown                   | 6                  | 0.13           |

**Supplemental Data for:**

Sambucci O, Alston JM, Fuller KB and Lusk J. 2019.

The pecuniary and nonpecuniary costs of powdery mildew and the potential value of resistant grape varieties in California.

Am J Enol Vitic 70:177-187. doi: 10.5344/ajev.2018.18032.

**Supplemental Table 8** Importance of attributes scale questions.

| How important or unimportant is it that your vineyard uses vines (rootstock and scions) that have the following characteristics? <i>(Please check a box for each characteristic.)</i> | Very unimportant | Somewhat unimportant | Somewhat important | Very important | N/A |
|---------------------------------------------------------------------------------------------------------------------------------------------------------------------------------------|------------------|----------------------|--------------------|----------------|-----|
| Increase yield (tons produced per acre)                                                                                                                                               |                  |                      |                    |                |     |
| Produce a consistent yield from year-to-year                                                                                                                                          |                  |                      |                    |                |     |
| Be of a recognizable variety                                                                                                                                                          |                  |                      |                    |                |     |
| Delay budbreak (for frost protection)                                                                                                                                                 |                  |                      |                    |                |     |
| Reduce the need to apply insecticides                                                                                                                                                 |                  |                      |                    |                |     |
| Be resistant to herbicide                                                                                                                                                             |                  |                      |                    |                |     |
| Reduce the need to spray fungicides                                                                                                                                                   |                  |                      |                    |                |     |
| Facilitate the use of mechanized harvesting                                                                                                                                           |                  |                      |                    |                |     |
| Be more tolerant to frost and cold                                                                                                                                                    |                  |                      |                    |                |     |
| Be more tolerant to heat                                                                                                                                                              |                  |                      |                    |                |     |
| Be more tolerant to drought                                                                                                                                                           |                  |                      |                    |                |     |
| Be more tolerant to wet soil conditions                                                                                                                                               |                  |                      |                    |                |     |
| Ripen more uniformly                                                                                                                                                                  |                  |                      |                    |                |     |
| Produce more uniform berry shape and size                                                                                                                                             |                  |                      |                    |                |     |
| Produce looser grape clusters                                                                                                                                                         |                  |                      |                    |                |     |
| Improved acid/sugar balance in fruit                                                                                                                                                  |                  |                      |                    |                |     |
| Produce fruit with more acidity                                                                                                                                                       |                  |                      |                    |                |     |
| Produce fruit with improved flavor or aroma                                                                                                                                           |                  |                      |                    |                |     |
| Ripen in a particular harvest window                                                                                                                                                  |                  |                      |                    |                |     |
| Produce uniform and consistent colored fruit                                                                                                                                          |                  |                      |                    |                |     |

**Supplemental Table 9** Experimental design.

| Attribute                           | Option A<br>(not powdery mildew [PM] resistant) | Option B<br>(PM resistant)                                                    |
|-------------------------------------|-------------------------------------------------|-------------------------------------------------------------------------------|
| Price (\$/vine)                     | \$2, \$3, \$4, or \$5                           | \$2, \$3, \$4, or \$5                                                         |
| Resistant to PM?                    | No                                              | Yes                                                                           |
| Genetically modified?               | No                                              | Yes or No                                                                     |
| Variety                             | Chardonnay                                      | “Chardonnay-like” (if non-genetically modified [GM])<br>or Chardonnay (if GM) |
| Number of fungicide applications/yr | 1, 3, or 6 applications/yr                      | 0 applications/yr                                                             |
| Changes in environmental impact     | 0, -50%, or -100%                               | -100%                                                                         |
| Changes in impact on worker health  | 0, -50%, or -90%                                | -100%                                                                         |

## Supplemental Data for:

Sambucci O, Alston JM, Fuller KB and Lusk J. 2019.

The pecuniary and nonpecuniary costs of powdery mildew and the potential value of resistant grape varieties in California. *Am J Enol Vitic* 70:177-187. doi: 10.5344/ajev.2018.18032.

---

---

## Supplemental References

- County of Alameda Department of Agriculture/Weights & Measures. 2015. 2015 Crop Report Alameda County. Available from: <https://www.acgov.org/cda/awm/resources/2015cropreport.pdf> [Accessed 1 December 2017].
- County of Amador Department of Agriculture/Weights and Measures. 2015. 2015 Amador County Agricultural Crop & Livestock Report. Available from: <http://www.co.amador.ca.us/home/showdocument?id=24259> [Accessed 1 December 2017].
- County of Colusa Department of Agriculture. 2015. Annual Crop Report 2015. Available from: <https://www.countyofcolusa.org/DocumentCenter/View/8248> [Accessed 1 December 2017].
- County of Contra Costa Department of Agriculture. 2015. Contra Costa County 2015 Annual Crop Report. Available from: <http://www.co.contra-costa.ca.us/DocumentCenter/View/41302>. [Accessed 1 December 2017].
- County of El Dorado Department of Agriculture/Weights & Measures. 2015. El Dorado County 2015 Crop Report. Available from: <https://www.edcgov.us/Government/ag/documents/2015%20Crop%20Report.pdf> [Accessed 1 December 2017].
- County of Fresno Department of Agriculture. 2015. Fresno County 2015 Annual Crop & Livestock Report. Available from: <http://www.co.fresno.ca.us/Home/ShowDocument?id=16902> [Accessed 1 December 2017].
- County of Glenn Department of Agriculture. 2015. Glenn County 2015 Annual Crop & Livestock Report. Available from: [https://www.countyofglenn.net/sites/default/files/Ag\\_Commissioner/Glenn%20County%202015%20Crop%20Report.pdf](https://www.countyofglenn.net/sites/default/files/Ag_Commissioner/Glenn%20County%202015%20Crop%20Report.pdf) [Accessed 1 December 2017].
- County of Kern Department of Agriculture and Measurement Standards. 2015. 2015 Kern County Agricultural Crop Report. Available from: [http://www.kernag.com/caap/crop-reports/crop10\\_19/crop2015.pdf](http://www.kernag.com/caap/crop-reports/crop10_19/crop2015.pdf) [Accessed 1 December 2017].
- County of Kings Department of Agriculture/Measurement Standards. 2015. 2015 Kings County Agricultural Crop Report. Available from: <https://www.countyofkings.com/home/showdocument?id=13237> [Accessed 1 December 2017].
- County of Lake Department of Agriculture. 2015. 2015 Crop Report. Available from: <http://www.co.lake.ca.us/Assets/Departments/Agriculture/docs/Crop+Reports/2015+Crop+Report.pdf> [Accessed 1 December 2017].
- County of Madera Department of Agriculture. 2015. Madera County 2015 Agricultural Crop Report. Available from: <http://www.madera-county.com/index.php/publications/crop-reports?download=6732:madera-county-2015-agricultural-crop-report> [Accessed 1 December 2017].
- County of Mendocino Department of Agriculture. 2015. Mendocino County 2015 Crop Report. Available from: <https://www.mendocino-county.org/home/showdocument?id=3274> [Accessed 1 December 2017].
- County of Merced Department of Agriculture. 2015. 2015 Report on Agriculture. Available from: <http://www.co.merced.ca.us/Archive/ViewFile/Item/521> [Accessed 1 December 2017].
- County of Monterey Agricultural Commissioner. 2015. 2015 Monterey County Crop Report. Available from: <http://www.co.monterey.ca.us/Home/ShowDocument?id=12607> [Accessed 1 December 2017].
- County of Napa Department of Agriculture and Weights and Measurements. 2015. 2015 Agricultural Crop Report. Available from: [www.countyofnapa.org/agcom/2015cropreport/](http://www.countyofnapa.org/agcom/2015cropreport/) [Accessed 1 December 2017].
- County of Riverside Agricultural Commissioner's Office. 2015. Riverside County Agricultural Production Report 2015. Available from: <http://www.rivcoawm.org/Portals/0/Publications/2015%20Reports/2015%20Riverside%20County%20Agricultural%20Production%20Report.pdf?ver=2016-09-01-062011-563> [Accessed 1 December 2017].
- County of Sacramento Agricultural Commissioner. 2015. Sacramento County 2015 Crop & Livestock Report. Available from: <http://www.agcomm.saccounty.net/Documents/CropandLivestockReports/2015Report.pdf> [Accessed 1 December 2017].
- County of San Benito Agricultural Commissioner's Office. 2015. 2015 Annual Crop Report. Available from: <http://cosb.us/wp-content/uploads/2015-Crop-Report-Final.pdf> [Accessed 1 December 2017].
- County of Santa Barbara Agricultural Commissioner's Office. 2015. Agricultural Production Report. Available from: <http://cosb.countyofsb.org/uploadedFiles/agcomm/crops/2015%20Crop%20Report.pdf> [Accessed 1 December 2017].
- County of Santa Clara Department of Food and Agriculture. 2015. Santa Clara County 2015 Crop Report. Available from: [https://www.sccgov.org/sites/ag/news/Documents/CropReport2015\\_FinalWEB.pdf](https://www.sccgov.org/sites/ag/news/Documents/CropReport2015_FinalWEB.pdf) [Accessed 1 December 2017].
- County of San Luis Obispo Department of Agriculture Weights and Measures. 2015. 2015 Annual Report. Available from: <http://www.slo-county.ca.gov/getattachment/a84d5d62-956c-4b57-8852-3535f46069bd/Crop-Report-2015.aspx> [Accessed 1 December 2017].
- County of Solano Office of Agricultural Commissioner. 2015. Crop and Livestock Report 2015. Available from: <https://www.solanocounty.com/civicax/filebank/blobdload.aspx?BlobID=23010> [Accessed 1 December 2017].
- County of Sonoma Office of the Agricultural Commissioner. 2015. 2015 Agricultural Crop Report. Available from: <http://sonomacounty.ca.gov/WorkArea/DownloadAsset.aspx?id=2147532372> [Accessed 1 December 2017].
- County of Stanislaus Agricultural Commissioner's Office. 2015. 2015 Annual Crop Report. Available from: <http://www.stanag.org/pdf/cropreport/cropreport2015.pdf> [Accessed 1 December 2017].
- County of Tulare Department of Agriculture. 2015. 2015 Tulare County Agricultural Crop and Livestock Report. Available from: <http://agcomm.co.tulare.ca.us/default/index.cfm/standards-and-quarantine/crop-reports1/crop-reports-2011-2020/2015-tulare-county-annual-crop-and-livestock-report-pdf/> [Accessed 1 December 2017].
- County of Yolo Department of Agriculture and Weights & Measures. 2015. Yolo County 2015 Agricultural Crop Report. Available from: <http://www.yolocounty.org/home/showdocument?id=37378> [Accessed 1 December 2017].
- University of California Cooperative Extension (UCCE), 2008–2016. Cost and Return Studies. Available from: <http://coststudies.ucdavis.edu/> [Accessed 1 December 2017].
- , 2016a. Sample Costs to Establish a Vineyard and Produce Wine Grapes: Cabernet Sauvignon Variety, San Joaquin Valley North. Available from: [https://coststudyfiles.ucdavis.edu/uploads/cs\\_public/e2/40/e24042b1-6b8d-4f0d-a885-c93dcb89cf20/2016grapewinelodifinaldraftdec5.pdf](https://coststudyfiles.ucdavis.edu/uploads/cs_public/e2/40/e24042b1-6b8d-4f0d-a885-c93dcb89cf20/2016grapewinelodifinaldraftdec5.pdf) [Accessed 1 December 2017].
- , 2016b. Sample Costs to Establish a Vineyard and Produce Wine Grapes: Chardonnay and Pinot noir Varieties, Russian River Valley

### **Supplemental Data for:**

Sambucci O, Alston JM, Fuller KB and Lusk J. 2019.

The pecuniary and nonpecuniary costs of powdery mildew and the potential value of resistant grape varieties in California. *Am J Enol Vitic* 70:177-187. doi: 10.5344/ajev.2018.18032.

---

---

### **Supplemental References**

- Sonoma County. Available from: [https://coststudyfiles.ucdavis.edu/uploads/cs\\_public/c6/28/c6287d1a-64b9-4ba6-b8ff-d83d6c0d0a64/amendedwinegrapesonomafinaldraft91817.pdf](https://coststudyfiles.ucdavis.edu/uploads/cs_public/c6/28/c6287d1a-64b9-4ba6-b8ff-d83d6c0d0a64/amendedwinegrapesonomafinaldraft91817.pdf) [Accessed 1 December 2017].
- 2016c. Sample Costs to Establish a Vineyard and Produce Wine Grapes Using Biodynamic Farm Standard Principles: Red and White Varieties, North Coast Mendocino County. Available from: [https://coststudyfiles.ucdavis.edu/uploads/cs\\_public/62/3a/623a8e4d-ba4c-4c7b-9f13-389e17fd1928/16winegrapebiodynamicmendocinofinaldraft61416-1.pdf](https://coststudyfiles.ucdavis.edu/uploads/cs_public/62/3a/623a8e4d-ba4c-4c7b-9f13-389e17fd1928/16winegrapebiodynamicmendocinofinaldraft61416-1.pdf) [Accessed 1 December 2017].
- 2013. Sample Costs to Establish a Vineyard and Produce Wine Grapes: Chardonnay Variety, Sacramento Valley. Available from: <http://coststudies.ucdavis.edu/files/2013/grapewinesv2013.pdf> [Accessed 6 September 2015].
- 2012a. Sample Costs to Establish a Vineyard and Produce Winegrapes: Cabernet Sauvignon, San Joaquin Valley North. Available from: <http://coststudies.ucdavis.edu/files/GrapeWineVN2012.pdf> [Accessed 6 September 2015].
- 2012b. Sample Costs to Establish a Vineyard and Produce Winegrapes: Cabernet Sauvignon, North Coast region, Napa County. Available from: <http://coststudies.ucdavis.edu/files/WinegrapeNC2012.pdf> [Accessed 6 September 2015].
- 2010. Sample Costs to Establish a Vineyard and Produce Winegrapes: Cabernet Sauvignon, North Coast region, Sonoma County. Available from: <http://coststudies.ucdavis.edu/files/grapewinesonoma2010.pdf> [Accessed 6 September 2015].
- 2008a. Sample Costs to Establish and Produce Grapes for Organic Raisins. Available from: <http://coststudies.ucdavis.edu/files/graperaisinorgvs08.pdf> [Accessed 6 September 2015].
- 2008b. Sample Costs to Establish and Produce Wine Grapes: Red Varieties, Cabernet Sauvignon. North Coast Region, Lake County. Available from: <http://coststudies.ucdavis.edu/files/grapewineredlake2008.pdf> [Accessed 6 September 2015].
- 2008c. Sample Costs to Establish and Produce Wine Grapes: White Varieties, Sauvignon blanc. North Coast Region, Lake County. Available from: <http://coststudies.ucdavis.edu/files/grapewinewhitenc2008.pdf> [Accessed 1 September 2015].

# Grape Grower Survey

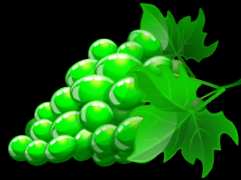

# Grape Grower Survey

**Investigator:** Julian Alston, Ph.D., University of California, Davis

**Purpose:** This study is meant to identify grower perceptions and preferences to help guide current and future grape genetics research. The responses will be used to inform participants involved in a project funded by a USDA-Specialty Crop Research Initiative grant supported with industry funding.

**Procedures:** Proceeding with the survey will imply your consent to participate in this study. There are 21 questions asking about your preferences and characteristics of your operation. The survey will take about 15 minutes to complete.

**Risks of Participation:** The risks associated with this study are minimal. The risks are not greater than those ordinarily encountered in daily life. Moreover, you may skip any survey items that you perceive as threatening or discomforting; you may also stop at any time.

**Benefits:** This research will aid in understanding and prioritizing grape genetics research.

**Confidentiality:** The researchers will not have access to your name. At no point will a data file be constructed in which your name is linked with your responses. The data will be stored by the principal investigator in his office with no intention to destroy the data. The data will only be released in summaries in which no individual's answers can be identified.

**Contacts:** If you have any questions or concerns about this project, please contact Dr. Julian Alston, (530) 752-3283, [julian@primal.ucdavis.edu](mailto:julian@primal.ucdavis.edu).

**Participant Rights:** Your participation in this research is voluntary. You can discontinue the survey at any time without reprisal or penalty.

**If you choose to participate:** Returning your completed survey indicates your willingness to participate in this research study.

**You may return this survey in person to our representative or by mail:**

**If you choose to return this survey by mail, please mail to:**

**Prof. Julian Alston  
Agricultural and Resource Economics  
UC Davis  
2157 Social Sciences and Humanities  
1 Shields Avenue  
Davis, CA 95616**

**1. Are you a grape producer?**

- Yes: → Please check the type of grapes you produce (Please check all that apply)
- Wine
  - Table
  - Raisin
- No → if no, please stop now and return the survey

**2. How important or unimportant is it that your vineyard uses vines (rootstock and scions) that have the following characteristics? (please check a box for each characteristic)**

|                                              | Very Unimportant | Somewhat Unimportant | Somewhat Important | Very Important | N/A |
|----------------------------------------------|------------------|----------------------|--------------------|----------------|-----|
| Increase yield (tons produced per acre)      |                  |                      |                    |                |     |
| Produce a consistent yield from year-to-year |                  |                      |                    |                |     |
| Be of a recognizable variety                 |                  |                      |                    |                |     |
| Delay budbreak (for frost protection)        |                  |                      |                    |                |     |
| Reduce the need to apply insecticides        |                  |                      |                    |                |     |
| Be resistant to herbicide                    |                  |                      |                    |                |     |
| Reduce the need to spray fungicides          |                  |                      |                    |                |     |
| Facilitate the use of mechanized harvesting  |                  |                      |                    |                |     |
| Be more tolerant to frost and cold           |                  |                      |                    |                |     |
| Be more tolerant to heat                     |                  |                      |                    |                |     |
| Be more tolerant to drought                  |                  |                      |                    |                |     |
| Be more tolerant to wet soil conditions      |                  |                      |                    |                |     |
| Ripen more uniformly                         |                  |                      |                    |                |     |
| Produce more uniform berry shape and size    |                  |                      |                    |                |     |
| Produce looser grape clusters                |                  |                      |                    |                |     |
| Improved acid/sugar balance in fruit         |                  |                      |                    |                |     |
| Produce fruit with more acidity              |                  |                      |                    |                |     |
| Produce fruit with improved flavor or aroma  |                  |                      |                    |                |     |
| Ripen in a particular harvest window         |                  |                      |                    |                |     |
| Produce uniform and consistent colored fruit |                  |                      |                    |                |     |

**3. Over the past five years, what is your target average annual yield (tons per acre)?**

tons/acre

**4. Over the past five years, what was the average price you received per ton of your grapes (\$/ton of fresh grapes)?**

5. Do you live on the same property as a vineyard you manage?  Yes  No
6. How many vineyard acres do you manage? (if you operate more than one vineyard, please answer according to the sum of all acres you manage)
- Less than 10 acres
  - 10 to 49 acres
  - 50 to 99 acres
  - 100 to 149 acres
  - 150 to 199 acres
  - 200 to 299 acres
  - 300 to 399 acres
  - 400 to 599 acres
  - 600 to 799 acres
  - 800 to 999 acres
  - 1000 to 1499 acres
  - 1500 to 1999 acres
  - 2000 acres or more
7. Over the past five years, on average how often did you apply fungicides to treat for powdery mildew each year?
- 0 to 2 times per year
  - 3 to 5 times per year
  - 6 to 8 times per year
  - 9 to 11 times per year
  - 12 to 14 times per year
  - 15 to 17 times per year
  - 18 times per year or more
8. What is the *primary* outlet for the grapes you produce?
- Grapes sold under a predetermined contract to a winery or other wine producer
  - Grapes sold under contract to a grape processor other than wine
  - Grapes sold on the open market at harvest
  - Grapes used for own wine production
  - Grapes sold for juice
  - None of the above
9. Over the past five years, what is your best estimate of the average annual costs (including labor, equipment, chemical, fuel, etc.) that you spent treating for powdery mildew?
- \$0 to \$49 per acre per year
  - \$50 to \$99 per acre per year
  - \$100 to \$149 per acre per year
  - \$150 to \$199 per acre per year
  - \$200 to \$249 per acre per year
  - \$250 to \$299 per acre per year
  - \$300 to \$349 per acre per year
  - \$350 to \$399 per acre per year
  - \$400 to \$449 per acre per year
  - \$450 to \$499 per acre per year
  - \$500 to \$549 per acre per year
  - \$550 to \$599 per acre per year
  - \$600 per acre per year or more

➤ We are now going to ask you eight repeated questions about your preferences for hypothetical types of vines or selections that geneticists and breeders might develop to work with new pesticides in assisting with powdery mildew resistance. Imagine you are selecting new vines for your primary vineyard. For simplicity sake, assume you have chosen to plant a Chardonnay or Chardonnay-like variety (a variety that is very similar to Chardonnay in all relevant characteristics).

In each question, you are presented with two hypothetical options: Option A and Option B. Below each option is a list of the characteristics of the option. We want to know which of the two options you would prefer if they were the only options available to you. Each option varies by:

- price of the vines
- whether the vines are genetically resistant to powdery mildew,
- whether the vines have been genetically modified,
- the expected number of fungicide applications required for the vines, and
- the expected environmental and health impacts resulting from the fungicide applications.

For options that are conventionally bred to be resistant to powdery mildew, the resulting vine cannot carry the Chardonnay varietal name; we simply refer to such varieties as ‘Chardonnay like’.

10. Of the two vine selections shown below, would you be most likely to purchase option A or option B? (please check only one of the two options below)

| Characteristic                                          | Grapevine A              | Grapevine B                        |
|---------------------------------------------------------|--------------------------|------------------------------------|
| Price                                                   | \$5/vine                 | \$3/vine                           |
| Resistant to Powdery Mildew?                            | No                       | Yes                                |
| Genetically Modified?                                   | No                       | No                                 |
| Variety                                                 | Chardonnay               | 'Chardonnay-like'                  |
| Expected Number of Fungicide Applications               | 3 times/year             | 0 times/year                       |
| Environmental Impact of Fungicide Applications          | same as at present       | 100% reduction relative to present |
| Impact of Fungicide Application on Worker Health        | same as at present       | 100% reduction relative to present |
| I prefer . . . (place a √ or X in the box under A or B) | <input type="checkbox"/> | <input type="checkbox"/>           |

11. Of the two vine selections shown below, would you be most likely to purchase option A or option B? (please check only one of the two options below)

| Characteristic                                          | Grapevine A                       | Grapevine B                        |
|---------------------------------------------------------|-----------------------------------|------------------------------------|
| Price                                                   | \$4/vine                          | \$2/vine                           |
| Resistant to Powdery Mildew?                            | No                                | Yes                                |
| Genetically Modified?                                   | No                                | Yes                                |
| Variety                                                 | Chardonnay                        | Chardonnay                         |
| Expected Number of Fungicide Applications               | 1 time/year                       | 0 times/year                       |
| Environmental Impact of Fungicide Applications          | same as at present                | 100% reduction relative to present |
| Impact of Fungicide Application on Worker Health        | 90% reduction relative to present | 100% reduction relative to present |
| I prefer . . . (place a √ or X in the box under A or B) | <input type="checkbox"/>          | <input type="checkbox"/>           |

12. Of the two vine selections shown below, would you be most likely to purchase option A or option B? *(please check only one of the two options below)*

| Characteristic                                                   | Grapevine A                        | Grapevine B                        |
|------------------------------------------------------------------|------------------------------------|------------------------------------|
| Price                                                            | \$2/vine                           | \$5/vine                           |
| Resistant to Powdery Mildew?                                     | No                                 | Yes                                |
| Genetically Modified?                                            | No                                 | No                                 |
| Variety                                                          | Chardonnay                         | 'Chardonnay-like'                  |
| Expected Number of Fungicide Applications                        | 6 times/year                       | 0 times/year                       |
| Environmental Impact of Fungicide Applications                   | 100% reduction relative to present | 100% reduction relative to present |
| Impact of Fungicide Application on Worker Health                 | 90% reduction relative to present  | 100% reduction relative to present |
| I prefer ... (place a $\checkmark$ or X in the box under A or B) | <input type="checkbox"/>           | <input type="checkbox"/>           |

13. Of the two vine selections shown below, would you be most likely to purchase option A or option B? *(please check only one of the two options below)*

| Characteristic                                                   | Grapevine A                       | Grapevine B                        |
|------------------------------------------------------------------|-----------------------------------|------------------------------------|
| Price                                                            | \$3/vine                          | \$5/vine                           |
| Resistant to Powdery Mildew?                                     | No                                | Yes                                |
| Genetically Modified?                                            | No                                | No                                 |
| Variety                                                          | Chardonnay                        | 'Chardonnay-like'                  |
| Expected Number of Fungicide Applications                        | 1 time/year                       | 0 times/year                       |
| Environmental Impact of Fungicide Applications                   | same as present                   | 100% reduction relative to present |
| Impact of Fungicide Application on Worker Health                 | 50% reduction relative to present | 100% reduction relative to present |
| I prefer ... (place a $\checkmark$ or X in the box under A or B) | <input type="checkbox"/>          | <input type="checkbox"/>           |

14. Of the two vine selections shown below, would you be most likely to purchase option A or option B? *(please check only one of the two options below)*

| Characteristic                                                   | Grapevine A                        | Grapevine B                        |
|------------------------------------------------------------------|------------------------------------|------------------------------------|
| Price                                                            | \$5/vine                           | \$2/vine                           |
| Resistant to Powdery Mildew?                                     | No                                 | Yes                                |
| Genetically Modified?                                            | No                                 | Yes                                |
| Variety                                                          | Chardonnay                         | Chardonnay                         |
| Expected Number of Fungicide Applications                        | 6 times/year                       | 0 times/year                       |
| Environmental Impact of Fungicide Applications                   | 100% reduction relative to present | 100% reduction relative to present |
| Impact of Fungicide Application on Worker Health                 | same as present                    | 100% reduction relative to present |
| I prefer ... (place a $\checkmark$ or X in the box under A or B) | <input type="checkbox"/>           | <input type="checkbox"/>           |

15. Of the two vine selections shown below, would you be most likely to purchase option A or option B? *(please check only one of the two options below)*

| Characteristic                                                   | Grapevine A                       | Grapevine B                        |
|------------------------------------------------------------------|-----------------------------------|------------------------------------|
| Price                                                            | \$5/vine                          | \$3/vine                           |
| Resistant to Powdery Mildew?                                     | No                                | Yes                                |
| Genetically Modified?                                            | No                                | No                                 |
| Variety                                                          | Chardonnay                        | 'Chardonnay-like'                  |
| Expected Number of Fungicide Applications                        | 6 times/year                      | 0 times/year                       |
| Environmental Impact of Fungicide Applications                   | 50% reduction relative to present | 100% reduction relative to present |
| Impact of Fungicide Application on Worker Health                 | 50% reduction relative to present | 100% reduction relative to present |
| I prefer ... (place a $\checkmark$ or X in the box under A or B) | <input type="checkbox"/>          | <input type="checkbox"/>           |

16. Of the two vine selections shown below, would you be most likely to purchase option A or option B? *(please check only one of the two options below)*

| Characteristic                                                   | Grapevine A                        | Grapevine B                        |
|------------------------------------------------------------------|------------------------------------|------------------------------------|
| Price                                                            | \$3/vine                           | \$4/vine                           |
| Resistant to Powdery Mildew?                                     | No                                 | Yes                                |
| Genetically Modified?                                            | No                                 | Yes                                |
| Variety                                                          | Chardonnay                         | Chardonnay                         |
| Expected Number of Fungicide Applications                        | 3 times/year                       | 0 times/year                       |
| Environmental Impact of Fungicide Applications                   | 100% reduction relative to present | 100% reduction relative to present |
| Impact of Fungicide Application on Worker Health                 | 50% reduction relative to present  | 100% reduction relative to present |
| I prefer ... (place a $\checkmark$ or X in the box under A or B) | <input type="checkbox"/>           | <input type="checkbox"/>           |

17. Of the two vine selections shown below, would you be most likely to purchase option A or option B? *(please check only one of the two options below)*

| Characteristic                                                   | Grapevine A                       | Grapevine B                        |
|------------------------------------------------------------------|-----------------------------------|------------------------------------|
| Price                                                            | \$2/vine                          | \$4/vine                           |
| Resistant to Powdery Mildew?                                     | No                                | Yes                                |
| Genetically Modified?                                            | No                                | Yes                                |
| Variety                                                          | Chardonnay                        | Chardonnay                         |
| Expected Number of Fungicide Applications                        | 1 time/year                       | 0 times/year                       |
| Environmental Impact of Fungicide Applications                   | 50% reduction relative to present | 100% reduction relative to present |
| Impact of Fungicide Application on Worker Health                 | same as present                   | 100% reduction relative to present |
| I prefer ... (place a $\checkmark$ or X in the box under A or B) | <input type="checkbox"/>          | <input type="checkbox"/>           |

➤ **Finally, we would like some background information. This is an important part of our analysis. The survey is anonymous and your name is not linked to the responses.**

**18. What is your gender?**

- Male
- Female

**19. Have you obtained a Bachelor's degree from a university or college?**

- Yes
- No

**20. What is your approximate annual household income before taxes last year?**

- Less than \$50,000
- \$50,000 to \$99,999
- \$100,000 to \$149,999
- \$150,000 to \$199,999
- \$200,000 to \$299,999
- \$300,000 or more

**21. What is your present age?**  years

**22. In which California county do you live?**  county

**Thank you for your help! Please return your survey.**
